# Supplementary material for: Is Left Ventricular Global Longitudinal Strain by Two-Dimensional Speckle Tracking Echocardiography in Sepsis Cardiomyopathy Ready for Prime Time Use in the ICU?
Source: Healthcare (Basel). 2019 Jan 3;7(1):5. doi: 10.3390/healthcare7010005 (PMC6473494; doi:10.3390/healthcare7010005)
Supplement: Supplementary file 1 [file healthcare-07-00005-s001.xlsx]

## Sheet: Sheet1
Table 1: Description of studies including design, inclusion criteria, subjects and imaging platforms/software.
Study	Setting	Geography	Study Design	Study period	Total patients	Excluded pts	No. of centers	Inclusion Criteria	Primary Outcome	Secondary outcomes	Cut off threshold GLS	Echo Machine	Software	Timing	Operator	r2 intra	r2 inter	Ventilator	Shock
											(%)							(%)	(%)
Chang et al. 2015[16]	University Hospital ICU	Taiwan	Prospective observational	January 2011 - June 2013	111	25	1	Septic shock	ICU mortality	Hospital mortality	-13	GE Vivid-I or Q	EchoPAC	<24 h	2 blinded	0.88	0.94
De Geer et al. 2015[17]	University Hospital mixed ICU	Sweden	Prospective observational	October 2012 - September 2014	44	7	1	Septic shock	ICU mortality	30 day, 90 day mortality	-15	GE Vivid E9	EchoPAC 112	<24 h	1	0.92		84
Landesberg et al. 2014 [18]	Tertiary academic institute	Israel	Prospective observational	April 2009 - March 2011	106	14	1	Severe sepsis and septic shock	hs-cardiac troponin elevation	Hospital mortality		Philips IE33	Philips Qlab 8.1	<24 h	2 blinded			100
Orde et al. 2014[19]	Tertiary academic center	USA	Prospective observational	August 2007 - January 2009	60	13	1	Severe sepsis and septic shock	30 day mortality	6 month mortality	-17	GE Vivid 7	Syngo Velocity Vector	<24 h	3	0.9 ± 0.9	0.8 ± 0.5	65
Palmeieri et al. 2015[20]	ED-HDU academic center	Italy	Prospective observational	October 2012 - April 2015	115	34	1	Sepsis and septic shock	28 day mortality	7 day mortality		Philips IE33	Philips Qlab 8.1	<24 h	3 blinded	0.9	0.82	0	39
Zaky et al. 2016[15]	Tertiary care center any ICU	USA	Retrospective observational	January 2008 - December 2011	54	43	1	Sepsis and/or septic shock	In-hospital mortality	Mechanical ventilation, ICU & hospital stay	-15	Philips IE33	Philips Qlab 4.1	<7 days	5	0.83	0.84
Lanspa et al. 2017[14]	Tertiary academic centers(2 hospitals, 3 ICUs)	USA	Prospective observational	October 2012 - November 2015	298	154	2	Severe sepsis or septic shock	In-hospital mortality, 28 day mortality	Organ failure free days	-17	Philips IE33 or CX50	Image Arena	<24 h				31	39
Yang et al. 2017[11]	Academic center	China	prospective observational	January 2016 - April 2017	58	7	1	Septic shock per sepsis 3	28 day mortality			GE Vivid-Q	EchoPAC	<24 h, day 1,3,7,14	2				100
																		0

## Sheet: Sheet2
Table 2: Exclusion Criteria
Study	Exclusion Criteria
Chang et al. 2015[16]	none
De Geer et al. 2015[17]	death<24 h, treatment limitations, no consent, Heart Failure, Ischemic Heart Disease
Landesberg et al. 2014[18]	Moderate mitral/aortic disease, poor windows, Atrial FIbrillation, arrhythmia, Regional Wall Motion Anamoly
Orde et al. 2014[19]	pregnancy, congenital Heart Disease, poor image quality, prosthetic valves, cardiomyopathy, moderate or severe valve disease
Palmeieri et al. 2015[20]	poor windows, greater than moderate aortic or mitral valve disease
Zaky et al. 2016[15]	<18 yrs, Atrial Fibrillation, LVEF<40%, valve disease, valve replacement, ICDs, poor Echo views
Lanspa et al. 2017[14]	echo >24 hrs, poor image quality
Yang et al. 2017[11]	Myocardial Infraction, congenital, valvular heart disease, hospitalization<24 h, malignancy, liver, kideny failure, pericardial effusion, advanced malignancy, poor image quality

## Sheet: Sheet3
Table 3: Outcomes
Study	ICU Non Survivor GLS	ICU survivor GLS	Hospital Non Survivor GLS	Hospital Survivor GLS	28 day Non Survivor GLS	28 day Survivor GLS	30 day Non Survivor GLS	30 day Survivor GLS	90 day Non Survivor GLS	90 day Survivor GLS	6 month Non Survivor GLS	6 month Survivor GLS	Abnormal GLS hospital mortality	Abnormal GLS hospital mortality	Normal GLS hospital mortality	Abnormal GLS 28 day mortality
	Mean ± SD in %												Alive n (%)	Dead n (%)	Dead n (%)	dead n (%)
Chang et al. 2015[16]	− 11.8 ± 4.5	−15 ± 3.6	−12.4 ± 4.9	−14.9 ± 3.4
De Geer et al. 2015[17]							−15 (−19.7 to −11)	−17.2 (−20 to −13)	−14.7 (−19 to −10.6)	−17.4 (−20.5 to −13.6)
Landesberg et al. 2014[18]			−12.3 ± 3.6	−13.7 ± 2.7
Orde et al. 2014[19]							−14.6 ± 4.3	− 13.92 ± 4.2			−14.28 ± 4.6	−14 ± 4
Palmeieri et al. 2015[20]					−9.1 ± 3.6	−10.8 ± 3.2
Zaky et al. 2016[15]													24 (80%)	12 (66.7)
Lanspa et al. 2017[14]														47(22)	31(17)	54(25)
Yang et al. 2017[11]					−15.98 ± 1.41	−17.66 ± 1.22
